# Supplementary material
Source: PubMed Central journal article supplement (PMC2917324)

## **Supplemental Legends**

### **Supplemental Table 1**

**Table of PCR primers and oligonucleotide (oligo) sequences**

### **Supplemental Figure 1**

Relative expression of *RNF135* in both uninfected and NDV-infected DCs from the population of donors. S1A. Scatter plot shows the correlations in expression level between the two isoforms. S1B. Box plot shows the *RNF135* expression ratio (short isoforms/long isoforms).

## Supplemental table 1

### Table of PCR primers and oligonucleotide (oligo) sequences

DNA primers for the real time measurement assays

| qRT-PCR primers for measurement of <i>IFNB1</i> , <i>DDX58</i> and <i>RNF135</i> long and short isoform mRNA and NDV virus RNA expression |                                                                                                                                           |
|-------------------------------------------------------------------------------------------------------------------------------------------|-------------------------------------------------------------------------------------------------------------------------------------------|
| <i>ACTB</i> R                                                                                                                             | GTGGACTTGGGAGAGGACTG                                                                                                                      |
| <i>ACTB</i> F                                                                                                                             | ACTGGAACGGTGAAGGTGAC                                                                                                                      |
| <i>IFNB1</i> R                                                                                                                            | ACAGCATCTGCTGGTTGAAG                                                                                                                      |
| <i>IFNB1</i> F                                                                                                                            | GTCAGAGTGGAAATCCTAAG                                                                                                                      |
| <i>DDX58</i> R                                                                                                                            | ATCCCGTTGATCTCCAGGGAA                                                                                                                     |
| <i>DDX58</i> F                                                                                                                            | AGTCTGACTGTCCTTTCTACTTGAAA                                                                                                                |
| <i>RNF135L</i> F                                                                                                                          | CGAACTGAGCATCCTGGGCAAGGCTT                                                                                                                |
| <i>RNF135L</i> R                                                                                                                          | CCTGCATTTGTGCTTCAGGAGCCTCTT                                                                                                               |
| <i>RNF135S</i> F                                                                                                                          | CGAACTGAGCATCCTGGGCAAGGAGA                                                                                                                |
| <i>RNF135S</i> R                                                                                                                          | TGAGCAAACCGAGAAGCTCTCCTGAG                                                                                                                |
| NDV-L R                                                                                                                                   | AGCACGAGTCAAGTACAGTACAGAA                                                                                                                 |
| NDV-L F                                                                                                                                   | ACTTGAAGCATAGTACCTGCCCTAA                                                                                                                 |
| PCR primers and competitive oligos for single cell real time RT-PCR assays of <i>IFNB1</i> and <i>DDX58</i> *                             |                                                                                                                                           |
| <i>IFNB1</i> R1                                                                                                                           | TTCTTCCAGGACTGTCTTCAGATGGTT                                                                                                               |
| <i>IFNB1</i> F1                                                                                                                           | CACTGGCTGGAATGAGACTATT                                                                                                                    |
| <i>IFNB1</i> MF                                                                                                                           | ATCCCGTTGATCTCCAGGGAA                                                                                                                     |
| <i>IFNB1</i> oligo                                                                                                                        | AAAGATTCATCTAGCACTGGCTGGAATGAGACTATTGTTGAG <b><i>TT</i></b><br><b><i>CCTCCT</i></b> GGCTAATGTCTATCATCAGATAAACCTCTGAAGACAGT<br>CCTGGAAGAAA |
| <i>DDX58</i> R1                                                                                                                           | GAAGCACTTGCTACCTCTTGC                                                                                                                     |
| <i>DDX58</i> F1                                                                                                                           | ATGTGGGCAATGTCATCAAA                                                                                                                      |
| <i>DDX58</i> MF                                                                                                                           | ATGTGGGCAATGTCATCAAAATGATCCAA                                                                                                             |
| <i>DDX58</i> oligo                                                                                                                        | GAGTATGTGGGCAATGTCATCAAAATGATCC <b><i>TT</i></b> ACCAG <b><i>AGGCAG</i></b><br>AGGAAGAGCAAGAGGTAGCAAGTGCTTCCTTCTGAC                       |
| PCR primers for allele specific PCR assays of <i>DDX58</i>                                                                                |                                                                                                                                           |
| <i>DDX58</i> R2                                                                                                                           | CCTCATGGGGTTGATCTCCAGGGAA                                                                                                                 |
| <i>DDX58</i> F2                                                                                                                           | GTCTGACTGTCCTTTCTACTTGAAA                                                                                                                 |
| <i>DDX58</i> RT                                                                                                                           | TTGCTGATGCTTCAAAGAGCTTAGTTTGT                                                                                                             |
| <i>DDX58</i> RC                                                                                                                           | TTGCTGATGCTTCAAAGAGCTTAGTTTGC                                                                                                             |
| PCR primers for genotyping of <i>DDX58</i> by RFLP                                                                                        |                                                                                                                                           |
| <i>DDX58</i> R2                                                                                                                           | CCTCATGGGGTTGATCTCCAGGGAA                                                                                                                 |
| <i>DDX58</i> F2                                                                                                                           | GTCTGACTGTCCTTTCTACTTGAAA                                                                                                                 |

\* Competitor oligonucleotides for *IFNB1* and *DDX58* were designed to have identical cDNA sequence but with a 2nt substitution (letter bold italicized) and lack 6nt Roche probe binding site (sequences bold underlined)

**S1A**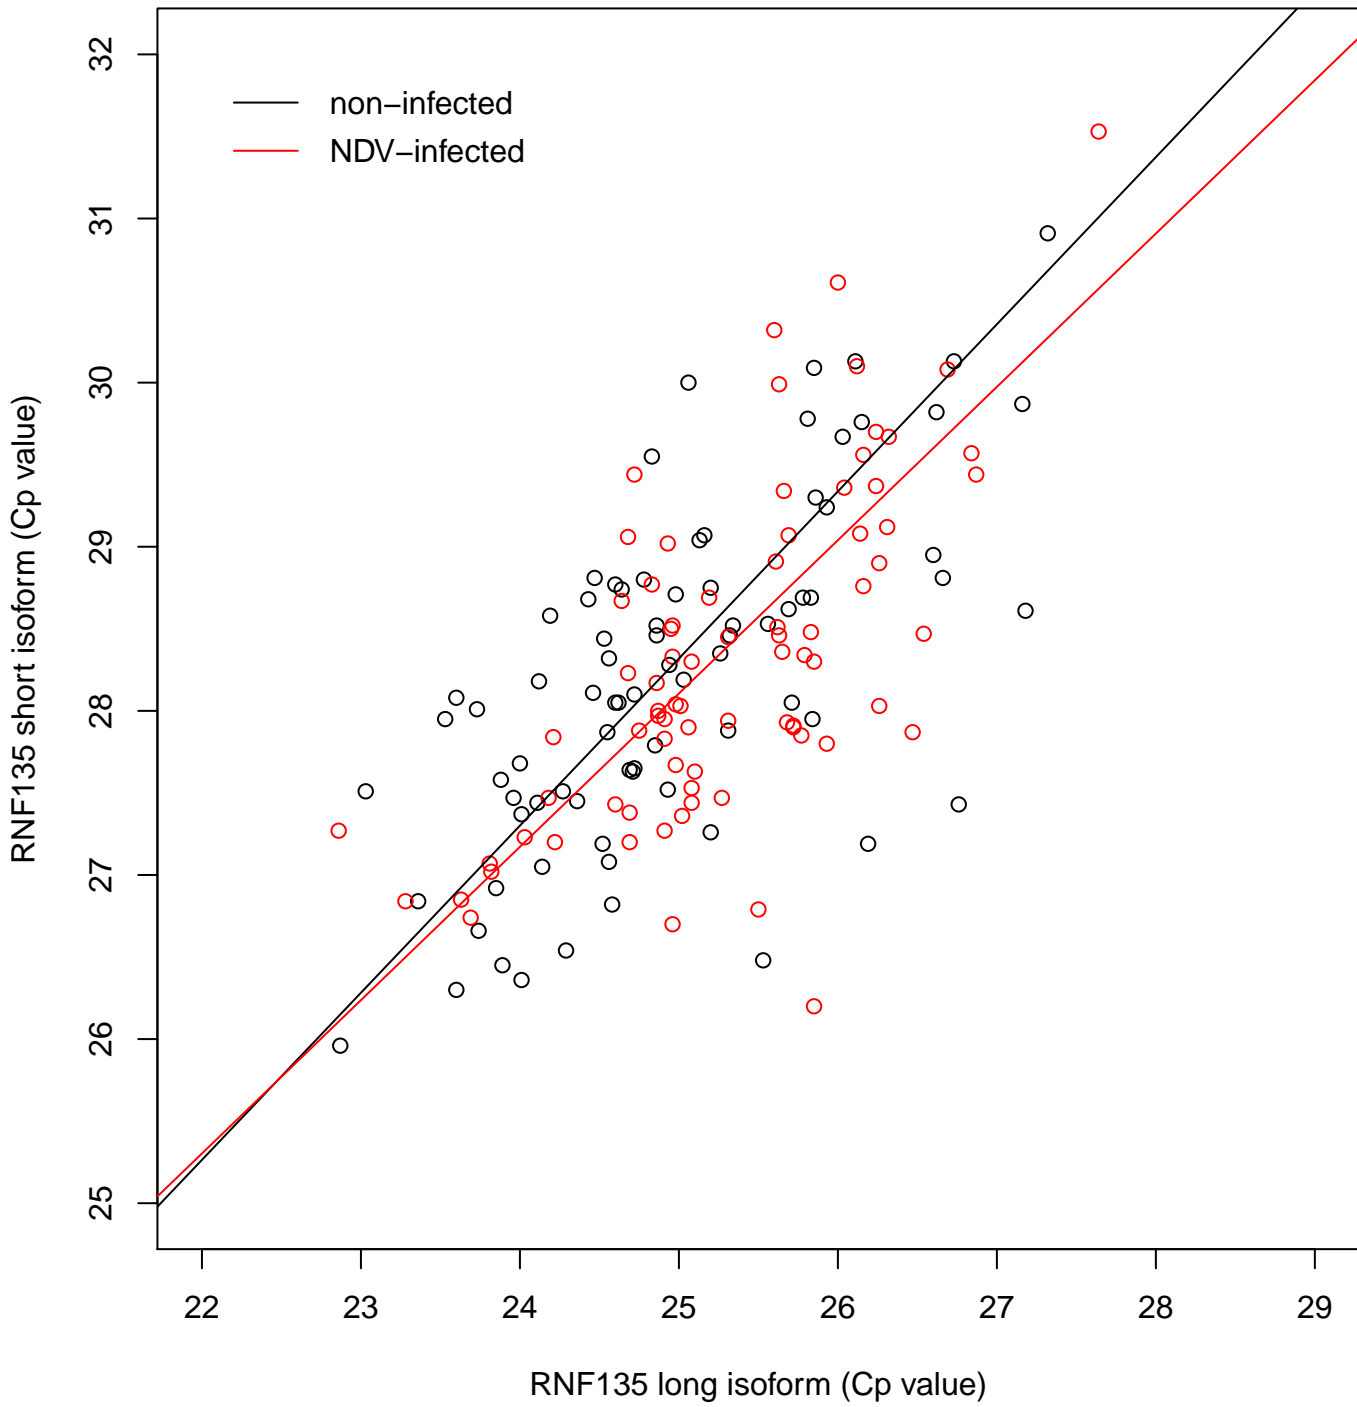**S1B**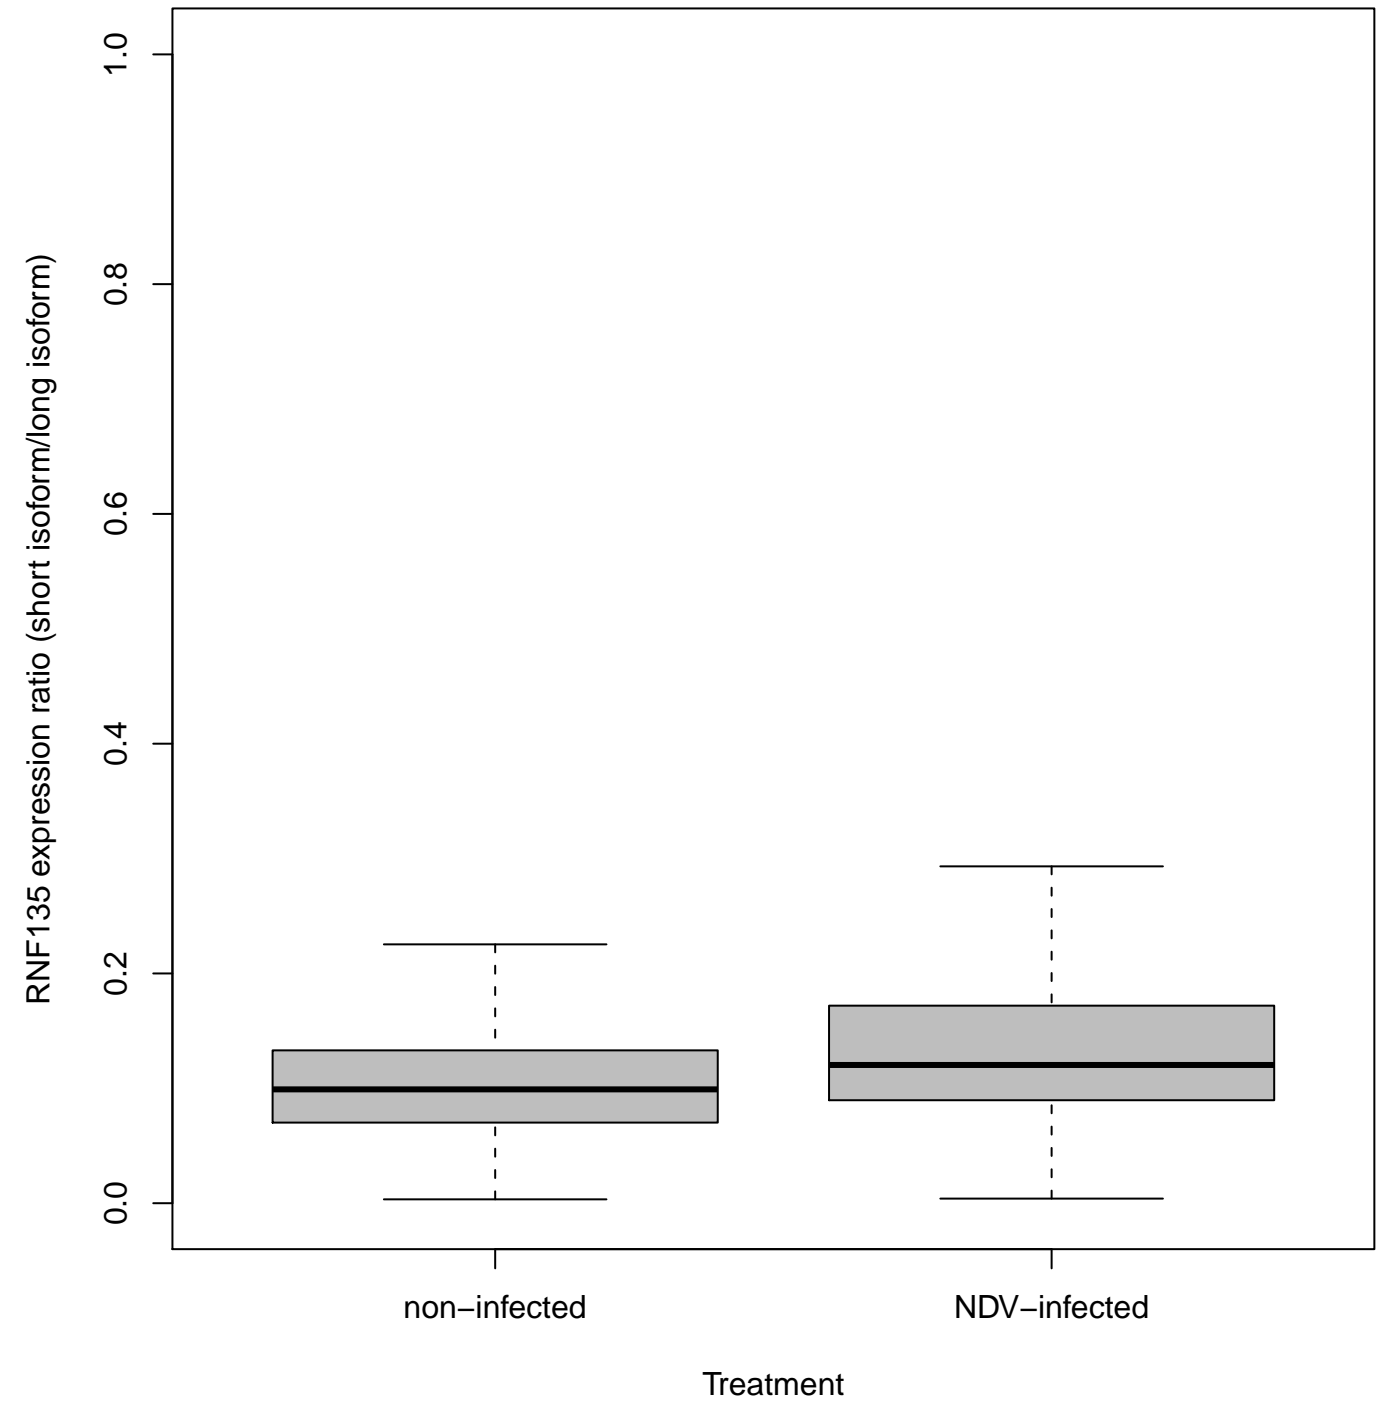

Supplement: NIHMS221176-supplement-Supplemental_Table_1_and_Figure_1.pdf [file NIHMS221176-supplement-Supplemental_Table_1_and_Figure_1.pdf]
